# Supplementary material for: Functionalized resorcin[4]arene-based coordination polymers as heterogeneous catalysts for click reactions
Source: Royal Society of Chemistry journal article supplement (doi:10.1039/d0nj06051h), 2021-01-01
Supplement: d0nj06051h1.pdf [file d0nj06051h1.pdf]

## Supplementary Information

### Functionalized resorcin[4]arene-based coordination polymers as heterogeneous catalyst for click reactions

Fei-Fei Wang,<sup>a†</sup> Jia-Hui Li,<sup>a†</sup> Hai-Yan Liu,<sup>b</sup> Shu-Ping Deng,<sup>b</sup> Ying-Ying Liu<sup>\*a</sup> and  
Jian-Fang Ma<sup>\*a</sup>

*<sup>a</sup>Key Lab of Polyoxometalate Science, Department of Chemistry, Northeast Normal University, Changchun 130024, China*

*<sup>b</sup>Key Lab of Chemical Additive Synthesis and Separation, Department of Chemical and Environmental Engineering, Yingkou Institute of Technology, Yingkou 115014, China*

#### Table of Contents

1. Materials and Instrumentation
2. X-ray crystallography
3. Experimental Section
  - 3.1 Spectroscopic data of L (Fig. S1)
  - 3.2 Procedure for reactions of benzyl azide and phenylacetylene
  - 3.3 Procedure for reactions of  $\beta$ -OH azide and phenylacetylene
4. Crystallographic data and structure refinements for **1-3** (Table S1)
5. PXRD curves (Fig. S4), IR spectra (Fig. S5), TGA curve (Fig. S6) of **1-3**
6. Selected bond distances ( $\text{\AA}$ ) and angles ( $^\circ$ ) for **1-3** (Table S2-S4)
7. GC and  $^1\text{H}$  NMR spectra of the products (Fig S7-S18) for the reactions of benzyl azide and phenylacetylene
8. GC and  $^1\text{H}$  NMR spectra of the products (Fig S19-S27) for the for reactions of  $\beta$ -OH azide and phenylacetylene

## Materials and Instrumentation

Chemicals are purchased commercially. Resorcin[4]arenes ligand was synthesized by the literature procedure.<sup>[1]</sup> PXRD patterns were measured on a Rigaku Dmax 2000 X-ray diffractometer with graphite-monochromatized Cu K $\alpha$  radiation. IR spectra were measured on a Mattson Alpha-Centauri spectrometer. Thermogravimetric analysis was performed on a PerkinElmer model TG-7 analyzer. ICP measurements were conducted on a Leeman Laboratories Prodigy inductively coupled plasma-optical atomic emission spectrometer (ICP-AES). C, H, N and S contents were carried out on a Euro vector EA3000 elemental analyzer. The conversions of catalytic substrates were recorded by GC equipment with FID detector (GC-2014C, Shimadzu, Japan) and capillary (30 m  $\times$  0.25 mm i.d., WondaCap 17). <sup>1</sup>H NMR data were recorded in CDCl<sub>3</sub> on a Bruker 500 MHz.

## X-ray crystallography

Single crystal X-ray diffraction data of **1-3** were measured on an Oxford Diffraction Gemini R CCD diffractometer with graphite monochromated Mo K $\alpha$  radiation ( $\lambda = 0.71073 \text{ \AA}$ ) at room temperature. Their crystal structures were solved by direct methods and refined on F<sup>2</sup> by full-matrix least-squares with SHELXL-2018/3.<sup>[2-4]</sup> Non-hydrogen atoms were located from difference Fourier maps and refined anisotropically. The SQUEEZE function in PLATON was applied for **1-3** during the refinement because of the highly disordered solvents. Their formula were affirmed by thermogravimetric analysis, electron cloud density and elemental analysis. Crystallographic data are listed in Table S1. Selected bond distances and angles were given in Tables S2-S4.

## Experimental Section

### Spectroscopic data of L

In the IR spectrum of L, the bands at 1671 cm<sup>-1</sup>, 1580 cm<sup>-1</sup>, 1462 cm<sup>-1</sup>, 1413 cm<sup>-1</sup> and 791 cm<sup>-1</sup> are due to the aromatic C=N, C=C and C-H bonds. The bands at 2963 cm<sup>-1</sup> and 1380 cm<sup>-1</sup> are owing to -CH<sub>3</sub> groups. The band at 973 cm<sup>-1</sup> is because of C-O-C bonds and the band at 714 cm<sup>-1</sup> is assigned to the C-S bonds for 4-MPy.

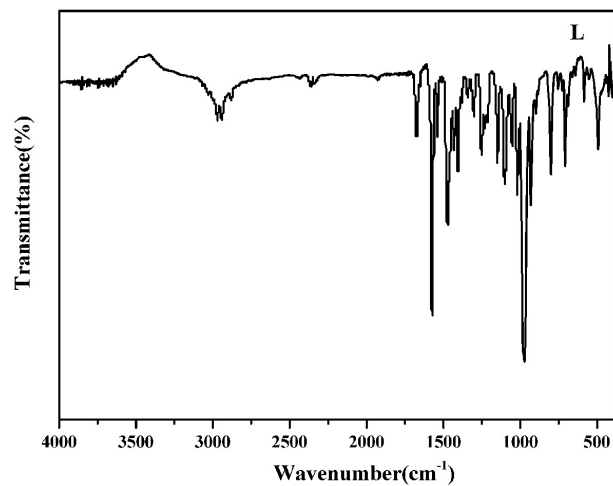

**Fig. S1** IR spectrum of L

In the UV-Vis diffuse reflectance spectrum of L, the ligand L exhibits a relatively wide absorption band between 200-310nm, which can be attributed to the  $\pi^* \rightarrow n$  or  $\pi^* \rightarrow \pi$  transition (Fig. S2).

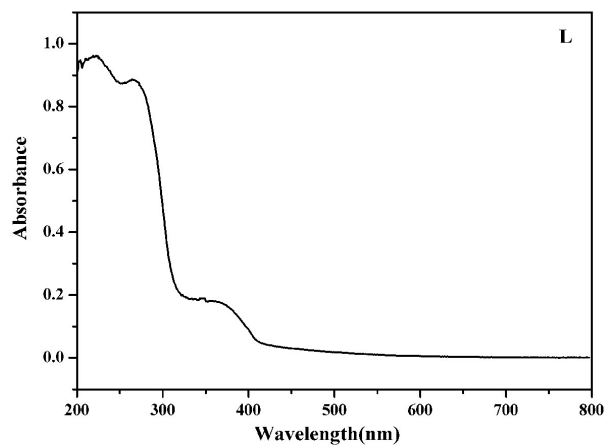

**Fig. S2** UV-Vis diffuse reflectance spectrum of L

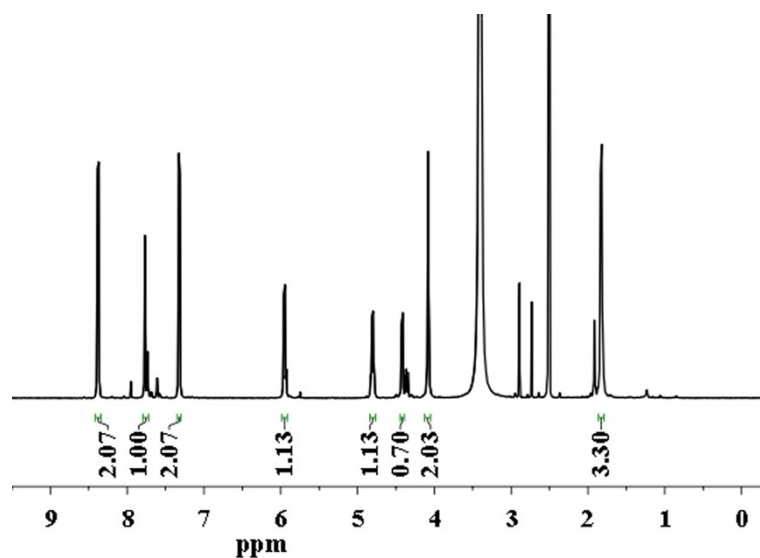

**Fig. S3**  $^1\text{H}$  NMR (500 MHz, DMSO) for L

#### **Procedure for reactions of benzyl azide and phenylacetylene**

A mixture of amyl acetate (0.92 mmol) as the internal standard, benzyl azide (1 mmol), alkyne (2 mmol), MeOH (4 mL) and catalyst (5 mg) was put in a 38 mL pressure-proof pipe and stirred at 80°C for 5 h. GC and  $^1\text{H}$  NMR were used to determine and confirm the conversions (Figs. S7-S18).

#### **Procedure for reactions of $\beta$ -OH azide and phenylacetylene**

The  $\beta$ -OH azide was synthesized in advance from epoxy compound and sodium azide. A mixture of internal standard ethylbenzene (1 mmol),  $\beta$ -OH azide (2 mmol), alkyne (1 mmol), MeOH (4 mL) and catalyst (10 mg) was put in a 38 mL pressure-proof pipe and stirred at 80°C for 8 h. GC and  $^1\text{H}$  NMR were applied to measure and certify the conversions (Figs. S19-S27). The  $\beta$ -OH azide was synthesized in advance with epoxy and sodium azide according to the literature.

#### **References**

- [1] L. Wang, T.-T. Guo, J.-C. Ma, Y.-Y. Liu, G.-H. Xu, J.-F. Ma, *ChemistrySelect* 2019, **4**, 7351–7357.
- [2] G. M. Sheldrick, *SHELXS-2018, Programs for X-ray Crystal Structure Solution*, University of Göttingen: Göttingen, Germany, 2018.

- [3] L. J. Farrugia, *WINGX: A Windows Program for Crystal Structure Analysis*, University of Glasgow: Glasgow, UK, 1988.
- [4] G. M. Sheldrick, *SHELXTL-2018, Programs for X-ray Crystal Structure Refinement*, University of Göttingen: Göttingen, Germany, 2018.

**Table S1** Crystallographic data and structure refinements for **1-3**

| Compound                                       | <b>1</b>                                                                                           | <b>2</b>                                                                                       | <b>3</b>                                                                                         |
|------------------------------------------------|----------------------------------------------------------------------------------------------------|------------------------------------------------------------------------------------------------|--------------------------------------------------------------------------------------------------|
| Formula                                        | Cu <sub>2</sub> C <sub>122.5</sub> H <sub>109</sub> N <sub>10</sub> O <sub>18</sub> S <sub>8</sub> | CdC <sub>82</sub> H <sub>97</sub> Cl <sub>2</sub> N <sub>9</sub> O <sub>8</sub> S <sub>4</sub> | Cd <sub>2</sub> C <sub>103</sub> H <sub>115</sub> N <sub>10</sub> O <sub>28</sub> S <sub>4</sub> |
| <i>Mr</i>                                      | 2392.75                                                                                            | 1732.4                                                                                         | 2053.78                                                                                          |
| Temperature (K)                                | 293(2)                                                                                             | 293(2)                                                                                         | 298(2)                                                                                           |
| Crystal system                                 | Monoclinic                                                                                         | Monoclinic                                                                                     | Orthorhombic                                                                                     |
| Space group                                    | <i>I2/a</i>                                                                                        | <i>P21/m</i>                                                                                   | <i>Pca21</i>                                                                                     |
| <i>a</i> (Å)                                   | 21.8025(10)                                                                                        | 11.1814(2)                                                                                     | 28.6962(18)                                                                                      |
| <i>b</i> (Å)                                   | 22.0950(10)                                                                                        | 23.0432(4)                                                                                     | 16.3215(10)                                                                                      |
| <i>c</i> (Å)                                   | 48.236(2)                                                                                          | 16.9568(4)                                                                                     | 20.5240(11)                                                                                      |
| $\alpha$ (°)                                   | 90                                                                                                 | 90                                                                                             | 90                                                                                               |
| $\beta$ (°)                                    | 90.174(4)                                                                                          | 107.771(2)                                                                                     | 90                                                                                               |
| $\gamma$ (°)                                   | 90                                                                                                 | 90                                                                                             | 90                                                                                               |
| <i>V</i> (Å <sup>3</sup> )                     | 23236.4(19)                                                                                        | 4160.54(15)                                                                                    | 9612.7(10)                                                                                       |
| <i>Z</i>                                       | 8                                                                                                  | 2                                                                                              | 4                                                                                                |
| <i>D</i> <sub>calc</sub> (g·cm <sup>-3</sup> ) | 1.368                                                                                              | 1.503                                                                                          | 1.585                                                                                            |
| <i>F</i> (000)                                 | 9952                                                                                               | 1948                                                                                           | 4220                                                                                             |
| <i>R</i> <sub>int</sub>                        | 0.0809                                                                                             | 0.0418                                                                                         | 0.0402                                                                                           |
| GOF on <i>F</i> <sup>2</sup>                   | 0.933                                                                                              | 0.969                                                                                          | 0.994                                                                                            |
| <sup>a</sup> <i>R</i> <sub>1</sub>             | 0.0782                                                                                             | 0.0388                                                                                         | 0.0527                                                                                           |
| <sup>b</sup> <i>wR</i> <sub>2</sub>            | 0.2484                                                                                             | 0.1050                                                                                         | 0.1467                                                                                           |

$${}^aR_1 = \sum ||F_o| - |F_c|| / \sum |F_o|, \quad {}^b wR_2 = \{ \sum w[(F_o)^2 - (F_c)^2]^2 / \sum w[(F_o)^2]^2 \}^{1/2}$$

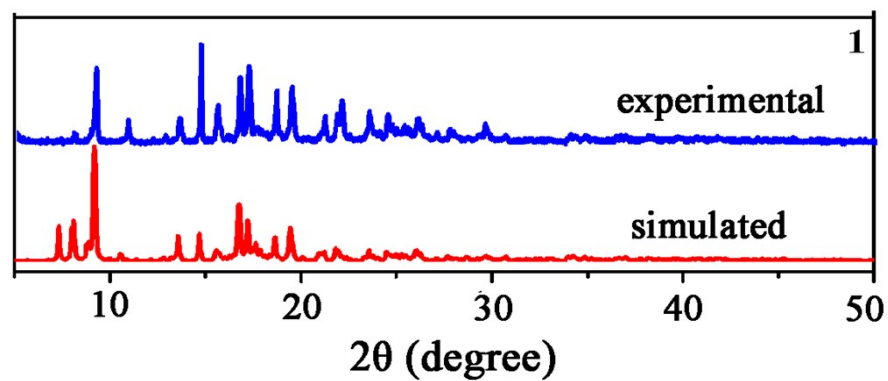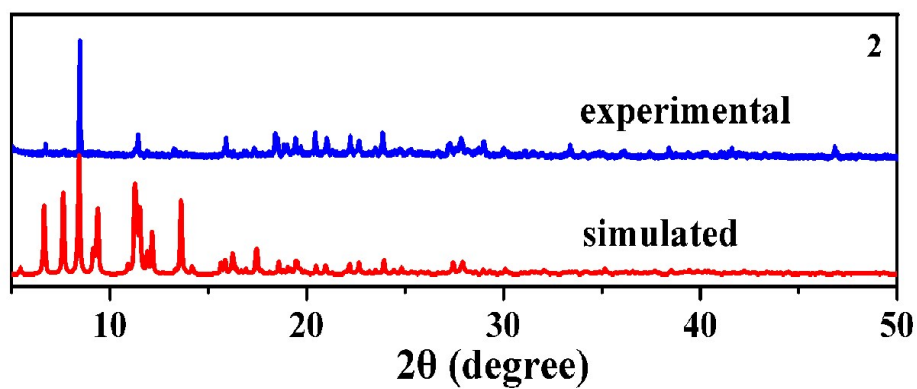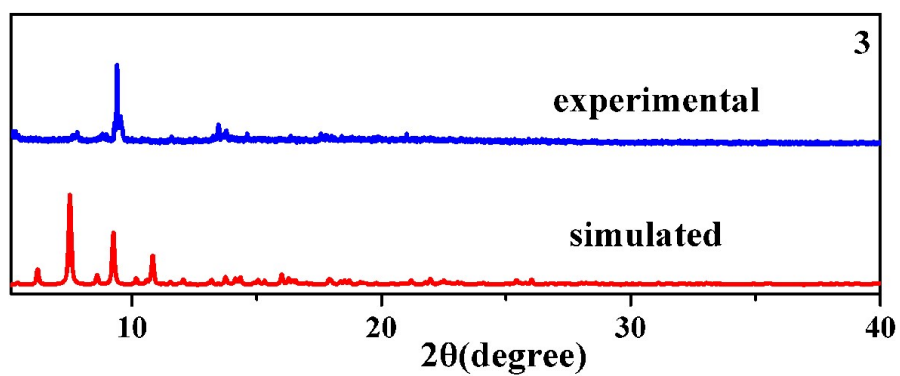

Fig. S4 PXR D curves of 1-3 simulated (red), experimental (blue).

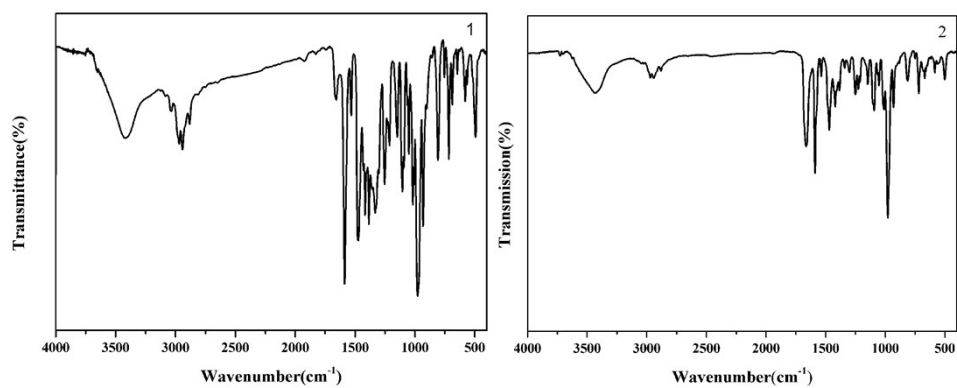

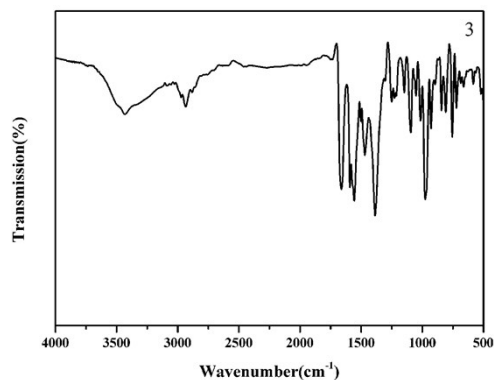

**Fig. S5** IR spectra of **1-3**.

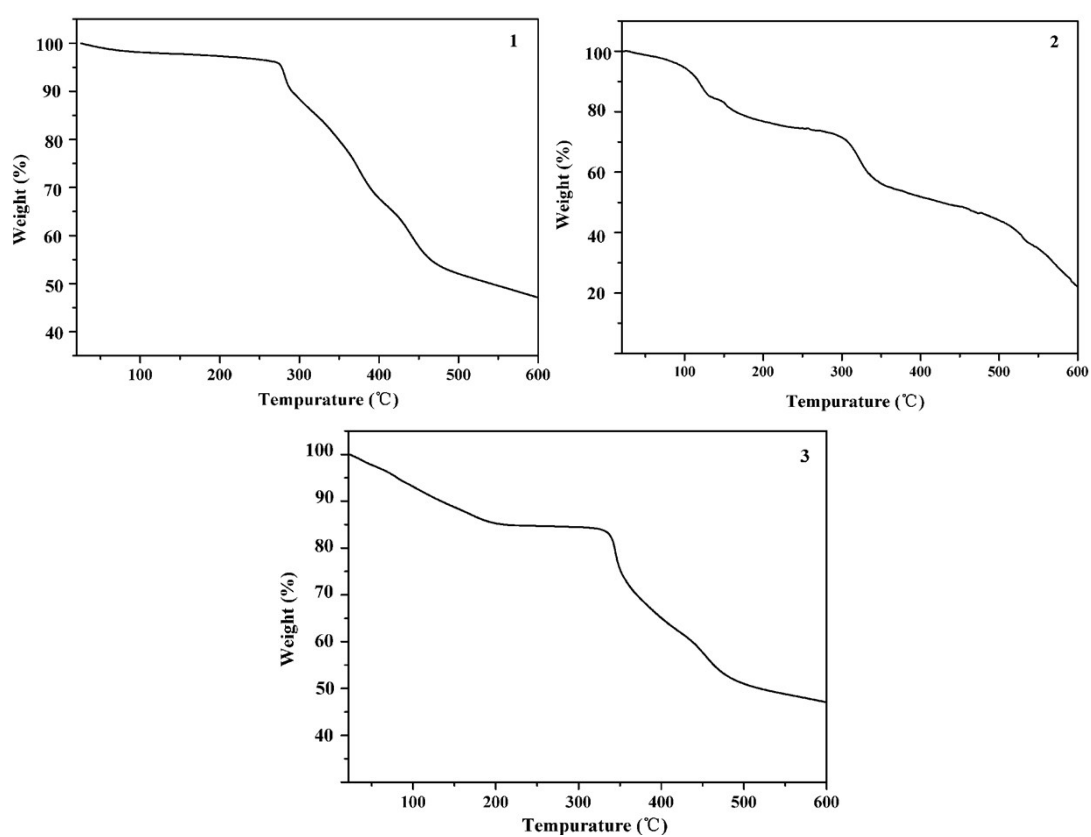

**Fig. S6** Thermogravimetric curves of **1-3**.

**Table S2.** Selected bond distances (Å) and angles (deg) for **1**.

|                               |          |                          |          |
|-------------------------------|----------|--------------------------|----------|
| Cu(1)-N(8)                    | 1.991(5) | Cu(1)-N(5) <sup>#1</sup> | 2.034(4) |
| Cu(1)-N(6)                    | 2.047(5) | Cu(1)-N(7) <sup>#2</sup> | 2.103(5) |
| Cu(2)-N(4) <sup>#3</sup>      | 2.027(5) | Cu(2)-N(1)               | 2.059(4) |
| Cu(2)-N(3)                    | 2.059(5) | Cu(2)-N(2)               | 2.074(5) |
| N(8)-Cu(1)-N(5) <sup>#1</sup> | 125.0(2) | N(8)-Cu(1)-N(6)          | 118.2(2) |

|                                              |            |                                |            |
|----------------------------------------------|------------|--------------------------------|------------|
| N(5) <sup>#1</sup> -Cu(1)-N(6)               | 100.2(2)   | N(8)-Cu(1)-N(7) <sup>#2</sup>  | 94.0(2)    |
| N(5) <sup>#1</sup> -Cu(1)-N(7) <sup>#2</sup> | 109.7(2)   | N(6)-Cu(1)-N(7) <sup>#2</sup>  | 109.0(2)   |
| N(1)-Cu(2)-N(3)                              | 107.4(2)   | N(4) <sup>#3</sup> -Cu(2)-N(2) | 108.97(19) |
| N(1)-Cu(2)-N(2)                              | 105.02(18) | N(3)-Cu(2)-N(2)                | 110.2(2)   |

Symmetry transformations used to generate equivalent atoms: <sup>#1</sup> -x+1, -y+2, -z+1; <sup>#2</sup> x, -y+3/2, z+1/2; <sup>#3</sup> -x+1, y-1/2, -z+1/2.

**Table S3.** Selected bond distances (Å) and angles (deg) for **2**.

|                                               |            |                                               |            |
|-----------------------------------------------|------------|-----------------------------------------------|------------|
| Cd(1)-N(1)                                    | 2.386(2)   | Cd(1)-N(1) <sup>#1</sup>                      | 2.386(2)   |
| Cd(1)-N(2) <sup>#2</sup>                      | 2.4377(18) | Cd(1)-N(2) <sup>#3</sup>                      | 2.4377(18) |
| Cd(1)-Cl(1) <sup>#1</sup>                     | 2.5666(6)  | Cd(1)-Cl(1)                                   | 2.5666(6)  |
| N(1)-Cd(1)-N(1) <sup>#1</sup>                 | 180.0      | N(1)-Cd(1)-N(2) <sup>#2</sup>                 | 88.01(9)   |
| N(1) <sup>#1</sup> -Cd(1)-N(2) <sup>#2</sup>  | 91.99(9)   | N(1)-Cd(1)-N(2) <sup>#3</sup>                 | 91.99(9)   |
| N(1) <sup>#1</sup> -Cd(1)-N(2) <sup>#3</sup>  | 88.01(9)   | N(2) <sup>#2</sup> -Cd(1)-N(2) <sup>#3</sup>  | 180.00(9)  |
| N(1)-Cd(1)-Cl(1) <sup>#1</sup>                | 91.15(6)   | N(1) <sup>#1</sup> -Cd(1)-Cl(1) <sup>#1</sup> | 88.86(6)   |
| N(2) <sup>#2</sup> -Cd(1)-Cl(1) <sup>#1</sup> | 90.65(5)   | N(2) <sup>#3</sup> -Cd(1)-Cl(1) <sup>#1</sup> | 89.35(5)   |
| N(1)-Cd(1)-Cl(1)                              | 88.86(6)   | N(1) <sup>#1</sup> -Cd(1)-Cl(1)               | 91.14(6)   |
| N(2) <sup>#2</sup> -Cd(1)-Cl(1)               | 89.35(5)   | N(2) <sup>#3</sup> -Cd(1)-Cl(1)               | 90.65(5)   |
| Cl(1) <sup>#1</sup> -Cd(1)-Cl(1)              | 180.0      |                                               |            |

Symmetry transformations used to generate equivalent atoms: <sup>#1</sup> -x+2, -y+1, -z; <sup>#2</sup> x, y, z-1; <sup>#3</sup> -x+2, -y+1, -z+1.

**Table S4.** Selected bond distances (Å) and angles (deg) for **3**.

|                                |          |                                  |            |
|--------------------------------|----------|----------------------------------|------------|
| Cd(1)-O(12)                    | 2.304(5) | Cd(1)-N(1)                       | 2.327(6)   |
| Cd(1)-N(3) <sup>#1</sup>       | 2.320(5) | Cd(1)-O(10)                      | 2.333(6)   |
| Cd(1)-O(14) <sup>#2</sup>      | 2.370(7) | Cd(1)-O(13) <sup>#2</sup>        | 2.430(5)   |
| Cd(1)-O(11)                    | 2.596(7) | Cd(2)-O(15)                      | 2.450(8)   |
| Cd(2)-O(9)                     | 2.286(7) | Cd(2)-O(11)                      | 2.288(7)   |
| Cd(2)-N(4) <sup>#3</sup>       | 2.322(7) | Cd(2)-O(17) <sup>#4</sup>        | 2.331(7)   |
| Cd(2)-O(16) <sup>#4</sup>      | 2.377(7) | O(16) <sup>#4</sup> -Cd(2)-O(10) | 168.67(18) |
| Cd(2)-O(10)                    | 2.593(6) | O(15)-Cd(2)-O(10)                | 95.9(2)    |
| O(12)-Cd(1)-N(3) <sup>#1</sup> | 96.3(2)  | O(12)-Cd(1)-N(1)                 | 83.8(2)    |



|                                                |            |                                               |            |
|------------------------------------------------|------------|-----------------------------------------------|------------|
| N(3) <sup>#1</sup> -Cd(1)-N(1)                 | 176.7(2)   | O(12)-Cd(1)-O(10)                             | 125.2(2)   |
| N(3) <sup>#1</sup> -Cd(1)-O(10)                | 88.6(2)    | N(1)-Cd(1)-O(10)                              | 88.6(2)    |
| O(12)-Cd(1)-O(14) <sup>#2</sup>                | 136.2(2)   | N(3) <sup>#1</sup> -Cd(1)-O(14) <sup>#2</sup> | 91.0(2)    |
| N(1)-Cd(1)-O(14) <sup>#2</sup>                 | 91.2(2)    | O(10)-Cd(1)-O(14) <sup>#2</sup>               | 98.0(2)    |
| O(12)-Cd(1)-O(13) <sup>#2</sup>                | 82.0(2)    | N(3) <sup>#1</sup> -Cd(1)-O(13) <sup>#2</sup> | 94.5(2)    |
| N(1)-Cd(1)-O(13) <sup>#2</sup>                 | 88.7(2)    | O(10)-Cd(1)-O(13) <sup>#2</sup>               | 152.2(2)   |
| O(14) <sup>#2</sup> -Cd(1)-O(13) <sup>#2</sup> | 54.42(18)  | O(12)-Cd(1)-O(11)                             | 51.96(19)  |
| N(3) <sup>#1</sup> -Cd(1)-O(11)                | 91.5(2)    | N(1)-Cd(1)-O(11)                              | 86.0(2)    |
| O(10)-Cd(1)-O(11)                              | 73.4(2)    | O(14) <sup>#2</sup> -Cd(1)-O(11)              | 170.99(19) |
| O(13) <sup>#2</sup> -Cd(1)-O(11)               | 133.92(19) | O(9)-Cd(2)-O(11)                              | 125.8(2)   |
| O(9)-Cd(2)-N(4) <sup>#3</sup>                  | 92.5(3)    | O(11)-Cd(2)-N(4) <sup>#3</sup>                | 88.0(2)    |
| O(9)-Cd(2)-O(17) <sup>#4</sup>                 | 85.3(2)    | O(11)-Cd(2)-O(17) <sup>#4</sup>               | 148.5(2)   |
| N(4) <sup>#3</sup> -Cd(2)-O(17) <sup>#4</sup>  | 96.5(3)    | O(9)-Cd(2)-O(16) <sup>#4</sup>                | 139.7(2)   |
| O(11)-Cd(2)-O(16) <sup>#4</sup>                | 94.5(2)    | N(4) <sup>#3</sup> -Cd(2)-O(16) <sup>#4</sup> | 90.5(3)    |
| O(17) <sup>#4</sup> -Cd(2)-O(16) <sup>#4</sup> | 54.5(2)    | O(9)-Cd(2)-O(15)                              | 100.2(3)   |
| O(11)-Cd(2)-O(15)                              | 81.2(2)    | N(4) <sup>#3</sup> -Cd(2)-O(15)               | 166.6(3)   |
| O(17) <sup>#4</sup> -Cd(2)-O(15)               | 88.7(3)    | O(16) <sup>#4</sup> -Cd(2)-O(15)              | 82.5(3)    |
| O(9)-Cd(2)-O(10)                               | 51.7(2)    | O(11)-Cd(2)-O(10)                             | 74.2(2)    |
| N(4) <sup>#3</sup> -Cd(2)-O(10)                | 88.7(2)    | O(17) <sup>#4</sup> -Cd(2)-O(10)              | 136.9(2)   |

Symmetry transformations used to generate equivalent atoms: <sup>#1</sup> x-1/2, -y-1, z; <sup>#2</sup> -x+1/2, y, z-1/2; <sup>#3</sup> -x+1/2, y, z+1/2; <sup>#4</sup> -x, -y-1, z+1/2.

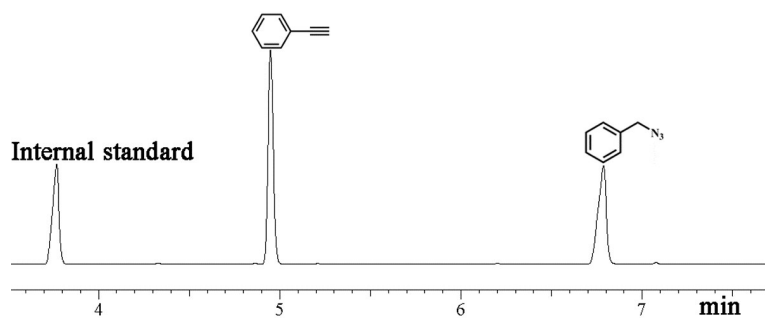

(a)

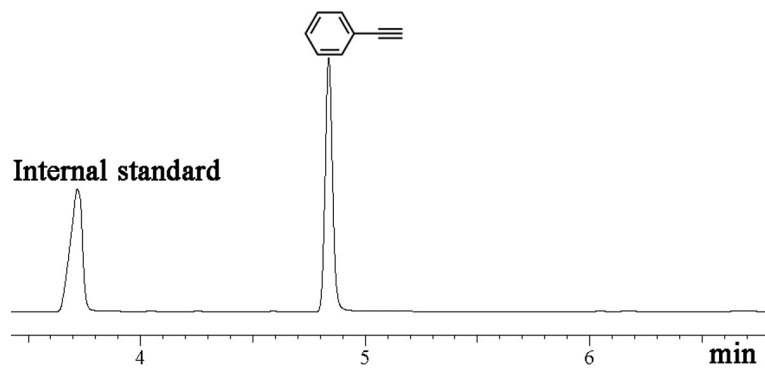

(b)

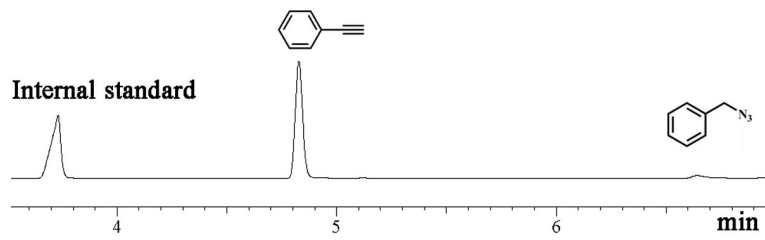

(c)

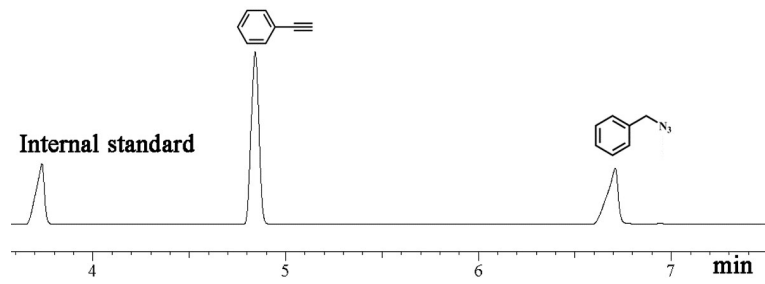

(d)

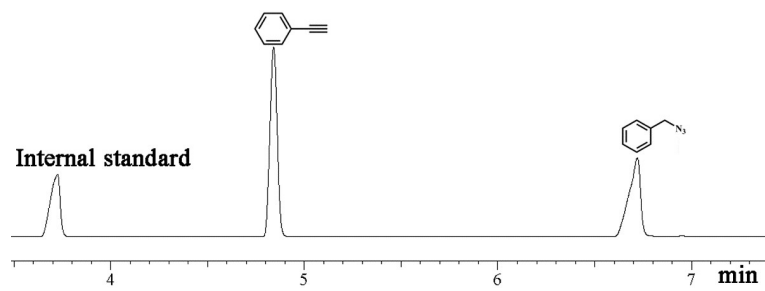

(e)

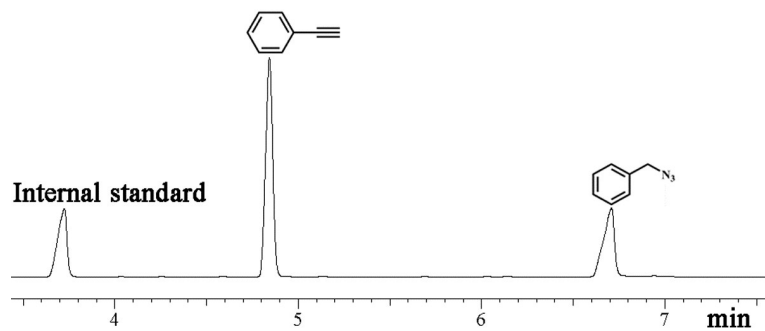

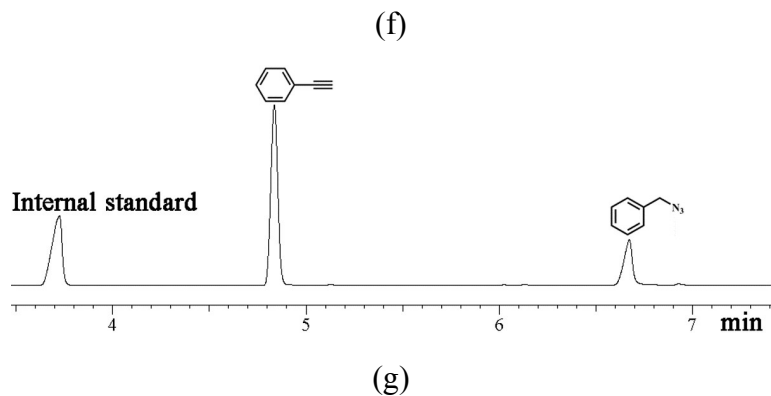

(g)

**Fig. S7** GC of reactions of benzyl azide and phenylacetylene under different conditions: (a) **1** (0 mg), MeOH, 5 h, 80°C. (b) **1** (5 mg), MeOH, 5 h, 80°C. (c) **1** (5 mg), EtOH, 5 h, 80°C. (d) **1** (5 mg), MeCN, 5 h, 80°C. (e) **1** (5 mg), MeOH, 5 h, 25°C. (f) **1** (5 mg), MeOH, 5 h, 40°C. (g) **1** (5 mg), MeOH, 5 h, 60 °C.

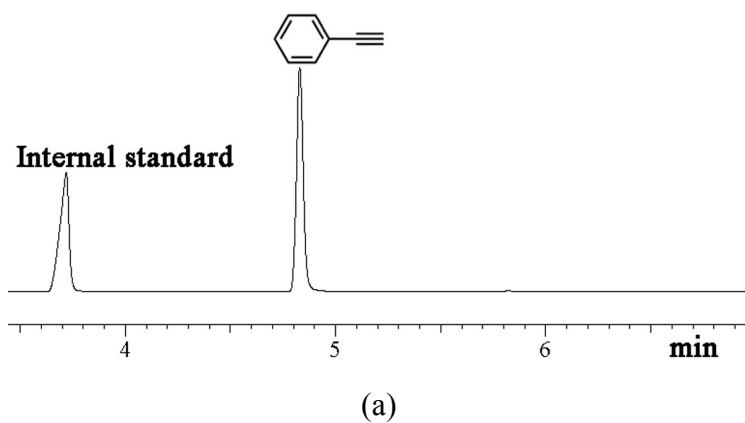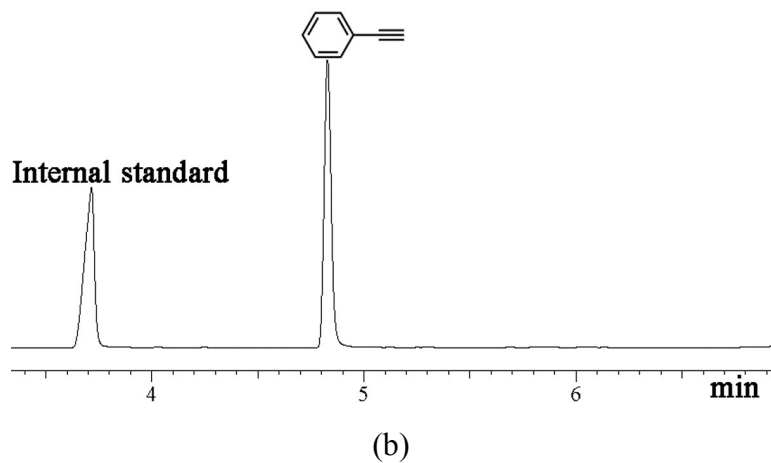

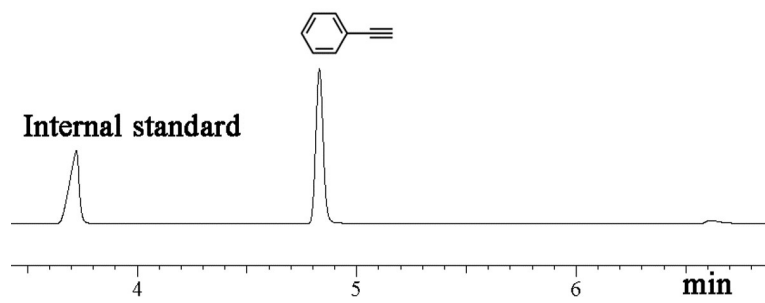

(c)

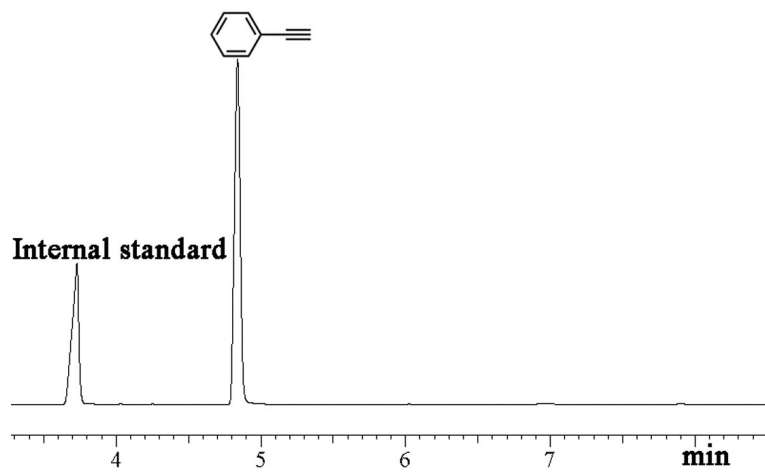

(d)

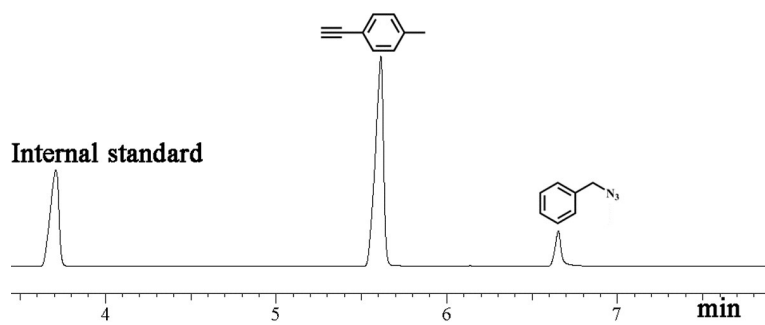

(e)

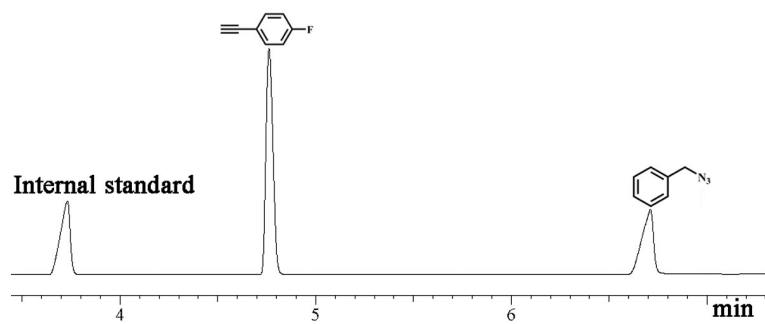

(f)

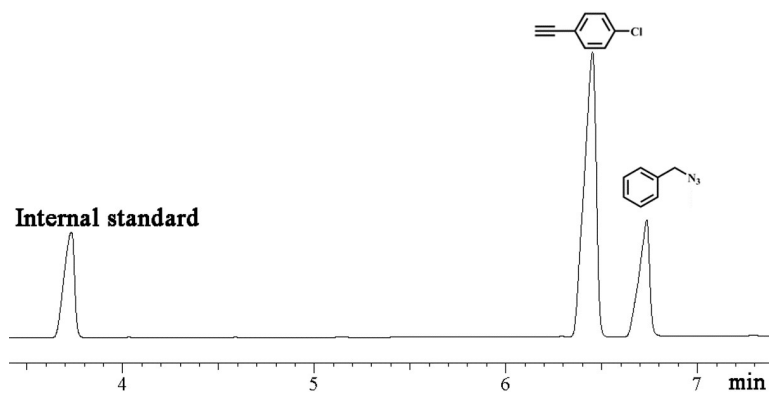

(g)

**Fig. S8** GC of reactions of substituted benzyl azides and phenylacetylenes with different groups under the same condition (1 (5 mg), MeOH, 5 h, 80 °C):

- (a) 1-(azidomethyl)-4-methylbenzene and phenylacetylene as substrates.
- (b) 1-(azidomethyl)-3-methylbenzene and phenylacetylene as substrates.
- (c) 1-(azidomethyl)-2-fluorobenzene and phenylacetylene as substrates.
- (d) 1-(azidomethyl)-4-nitrobenzene and phenylacetylene as substrates.
- (e) 1-(azidomethyl)benzene and 1-ethynyl-4-methylbenzene as substrates.
- (e) 1-(azidomethyl)benzene and 1-ethynyl-4-fluorobenzene as substrates.
- (g) 1-(azidomethyl)benzene and 1-ethynyl-4-chlorobenzene as substrates.

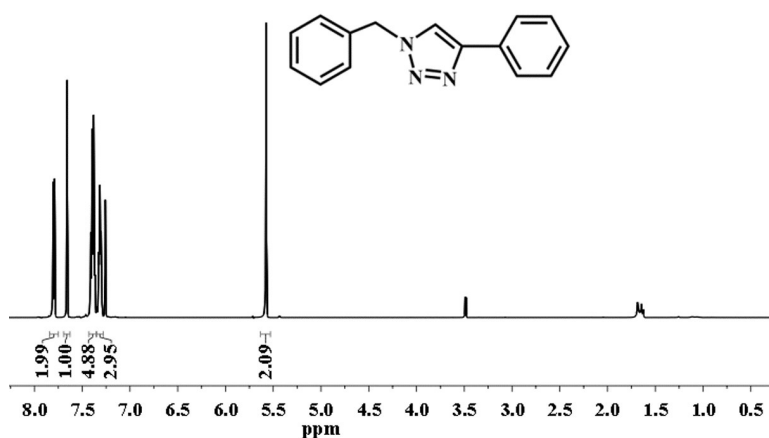

**Fig. S9**  $^1\text{H}$  NMR (500 MHz,  $\text{CDCl}_3$ ) for 1-benzyl-4-phenyl-1H-1,2,3-triazole.

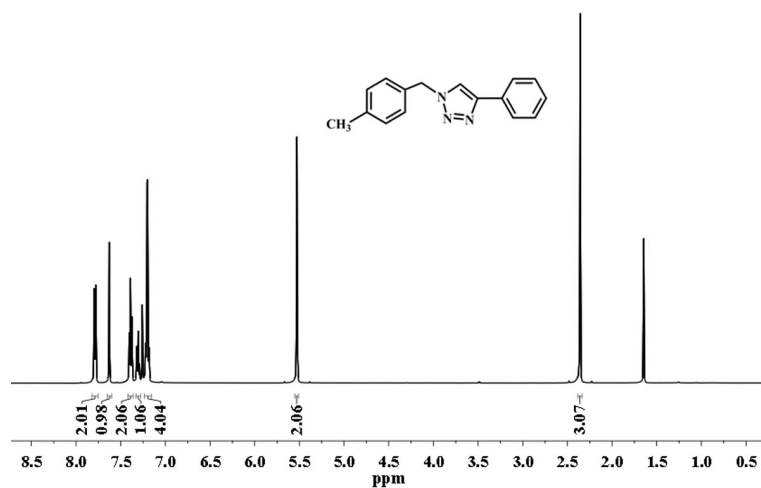

**Fig. S10**  $^1\text{H}$  NMR (500 MHz,  $\text{CDCl}_3$ ) for 1-(4-methylbenzyl)-4-phenyl-1H-1,2,3-triazole.

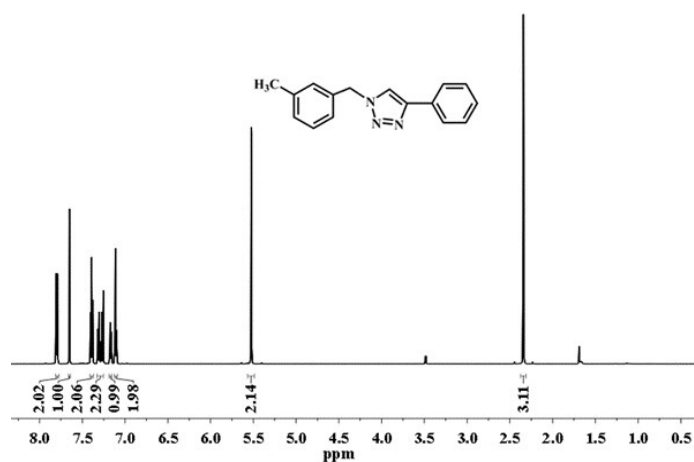

**Fig. S11**  $^1\text{H}$  NMR (500 MHz,  $\text{CDCl}_3$ ) for 1-(3-methylbenzyl)-4-phenyl-1H-1,2,3-triazole.

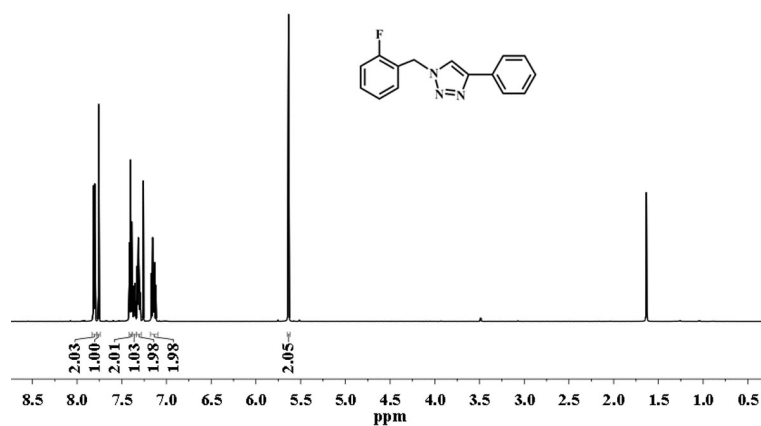

**Fig. S12**  $^1\text{H}$  NMR (500 MHz,  $\text{CDCl}_3$ ) for 1-(2-fluorobenzyl)-4-phenyl-1H-1,2,3-triazole.

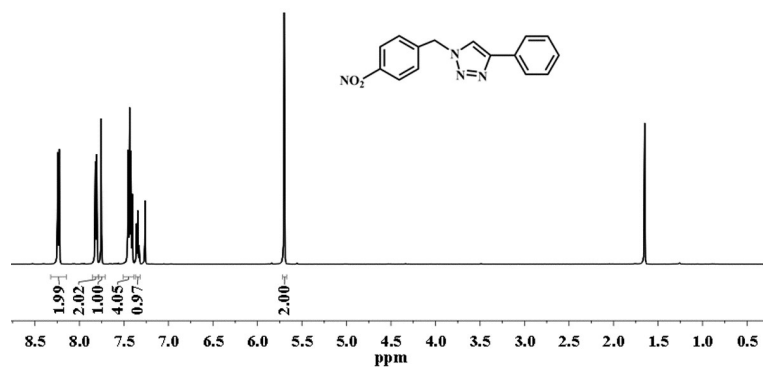

**Fig. S13**  $^1\text{H}$  NMR (500 MHz,  $\text{CDCl}_3$ ) for 1-(4-nitrobenzyl)-4-phenyl-1H-1,2,3-triazole.

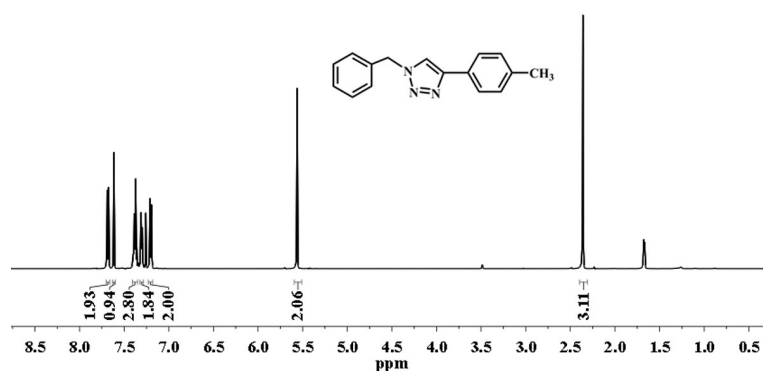

**Fig. S14**  $^1\text{H}$  NMR (500 MHz,  $\text{CDCl}_3$ ) for 1-benzyl-4-(4-methoxyphenyl)-1H-1,2,3-triazole.

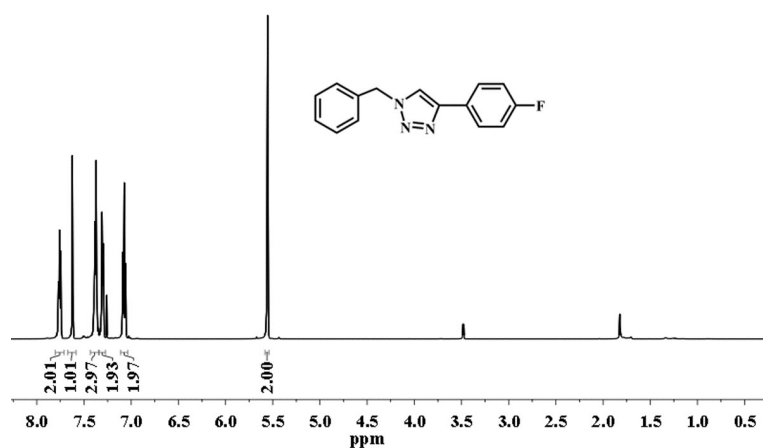

**Fig. S15**  $^1\text{H}$  NMR (500 MHz,  $\text{CDCl}_3$ ) for 1-benzyl-4-(4-fluorophenyl)-1H-1,2,3-triazole.

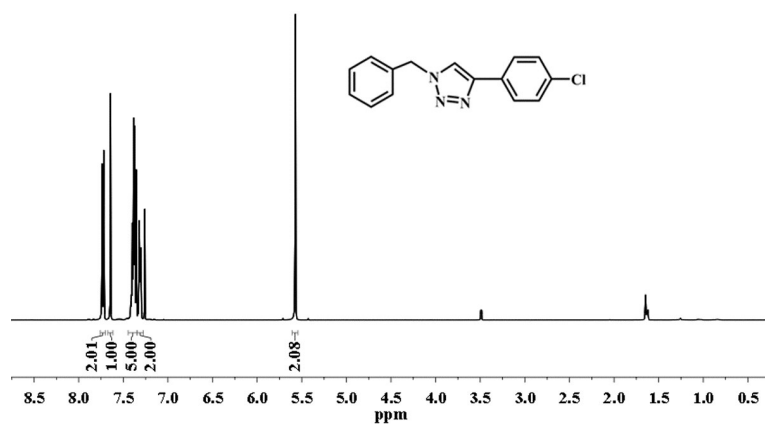

**Fig. S16**  $^1\text{H}$  NMR (500 MHz,  $\text{CDCl}_3$ ) for 1-benzyl-4-(4-chlorophenyl)-1H-1,2,3-triazole.

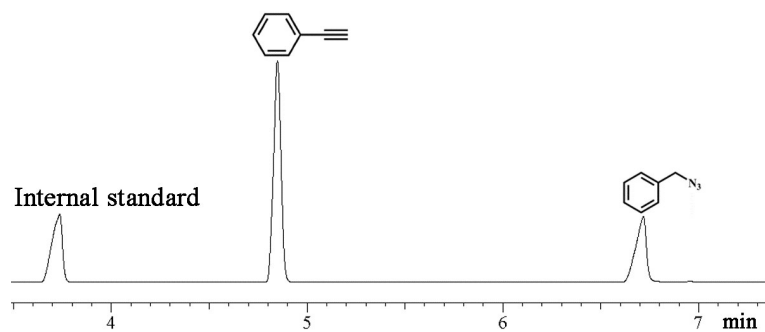

(a)

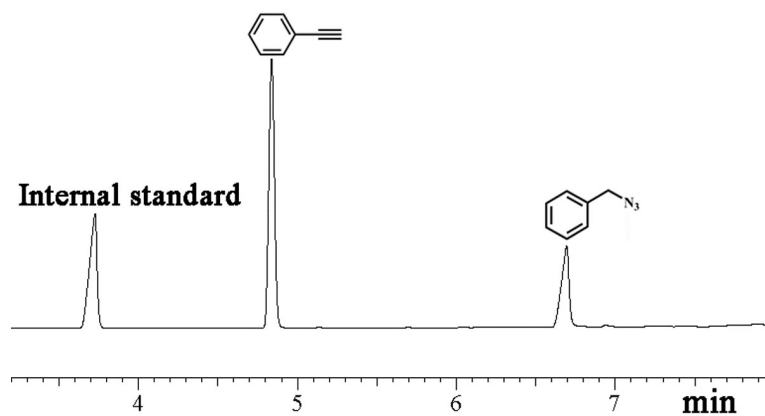

(b)

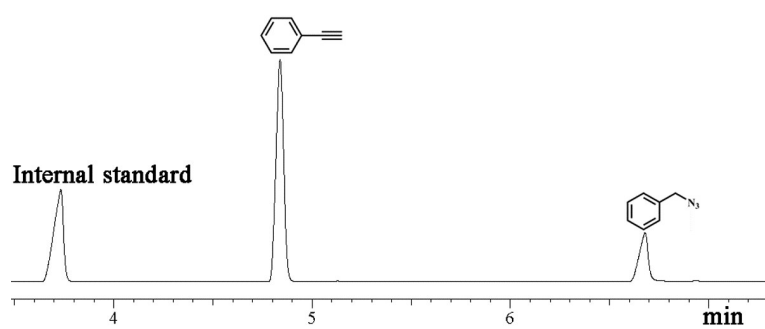

(c)



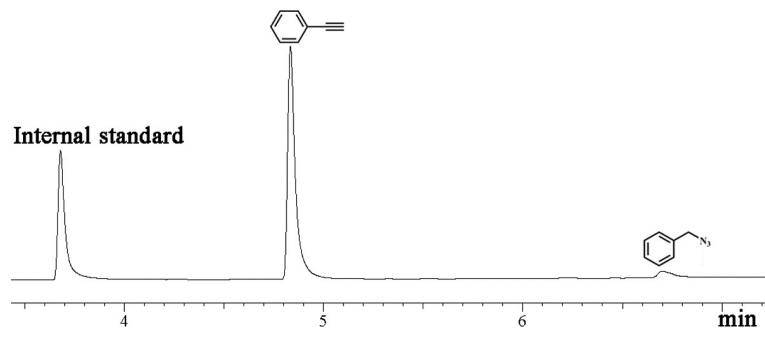

(d)

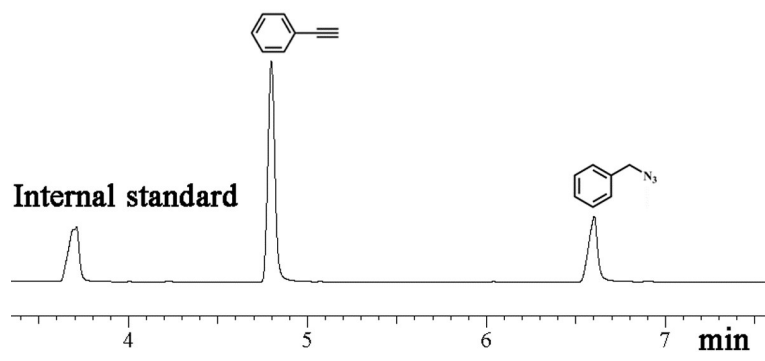

(e)

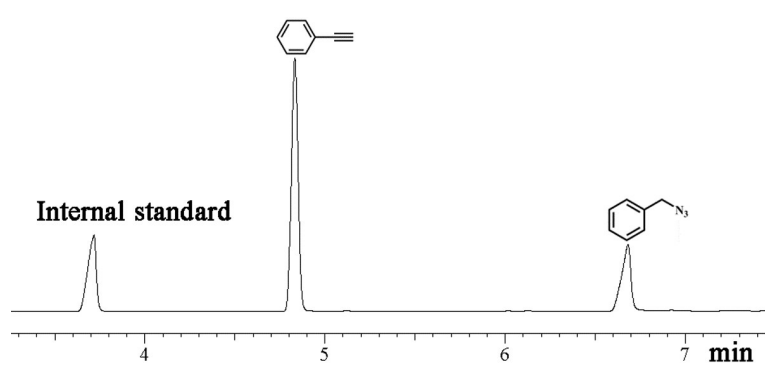

(f)

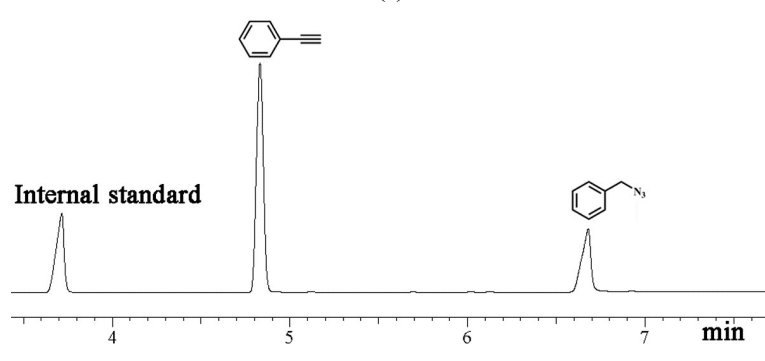

(g)

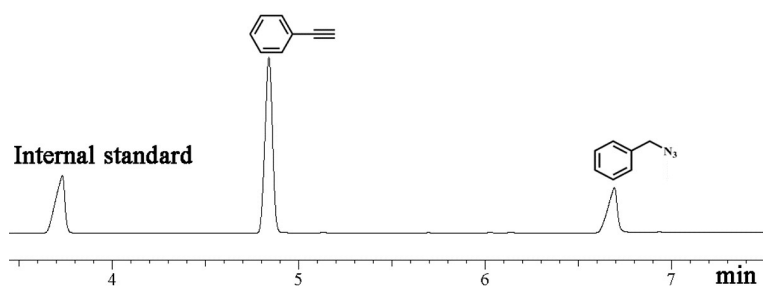

(h)

**Fig. S17** GC of reactions of benzyl azide and phenylacetylene with kinetic and hot filtration experiments: (a) **1** (5 mg), MeOH, 1h, 80°C. (b) **1** (5 mg), MeOH, 2h, 80°C. (c) **1** (5 mg), MeOH, 3h, 80 °C. (d) **1** (5 mg), MeOH, 4h, 80°C. (e) MeOH, 2 h, the filtrate after removing **1** after 1 h of the reaction. (f) MeOH, 3 h, the filtrate after removing **1** after 1 h of the reaction. (g) MeOH, 4 h, the filtrate after removing **1** after 1 h of the reaction. (h) MeOH, 5 h, the filtrate after removing **1** after 1 h of the reaction.

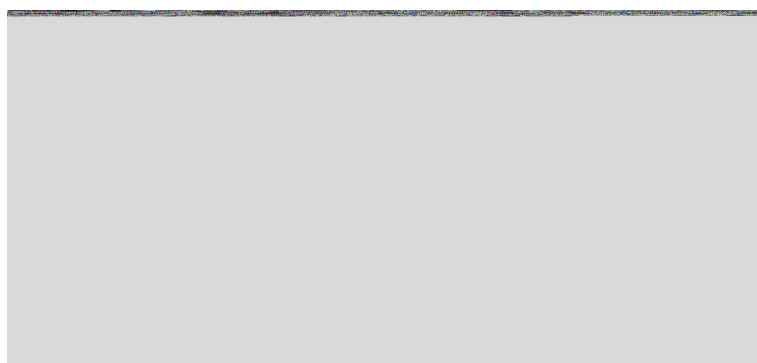

(a)

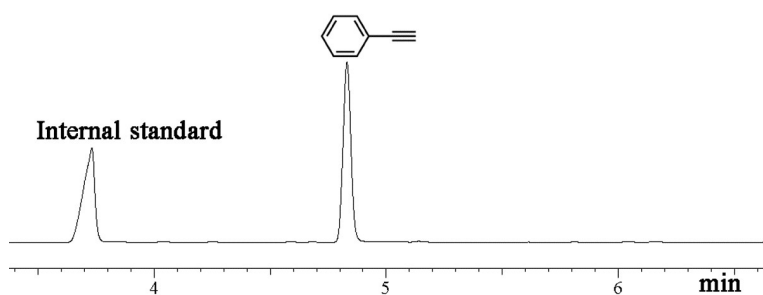

(b)

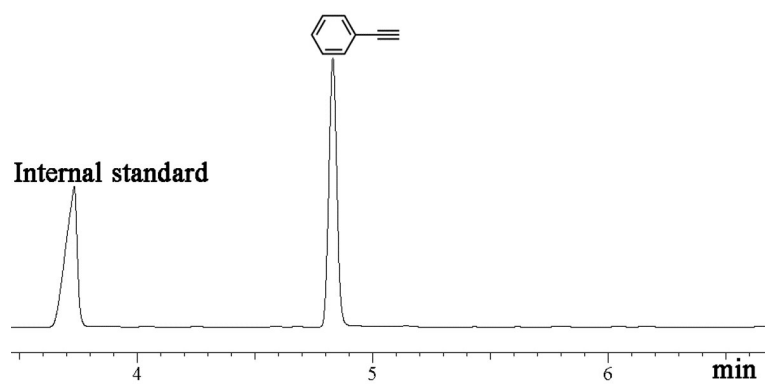

(c)

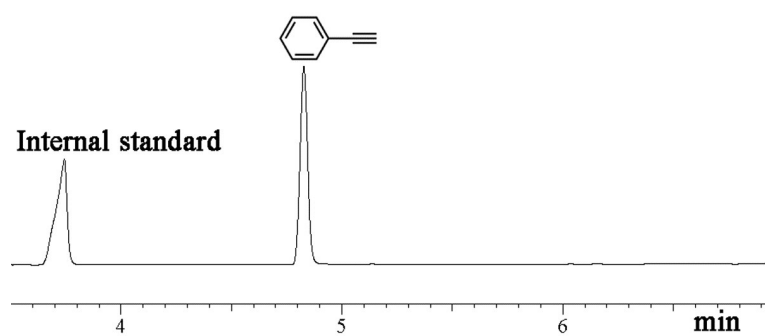

(d)

**Fig. S18** GC of reactions between benzyl azide and phenylacetylene in different circles: (a) the first circle. (b) the second circle. (c) the third circle. (d) the fourth circle.

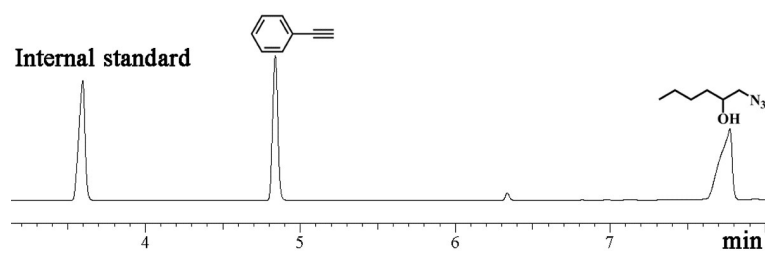

(a)

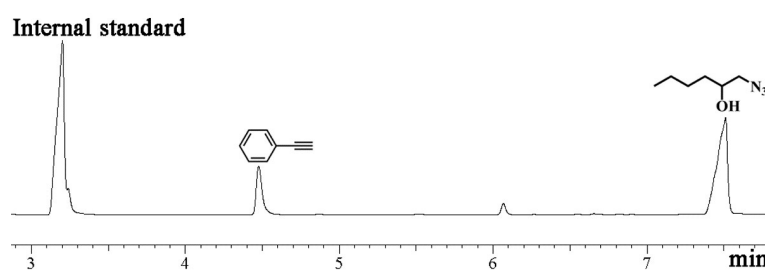

(b)

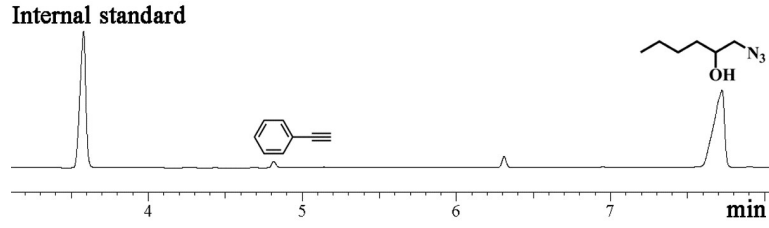

(c)

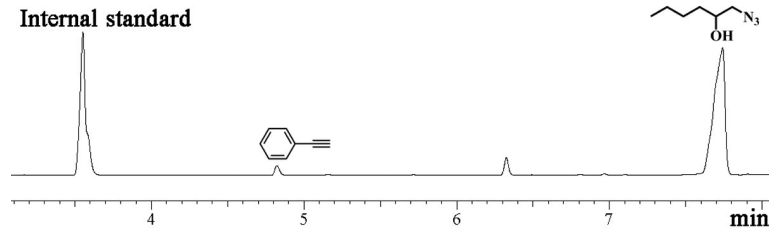

(d)

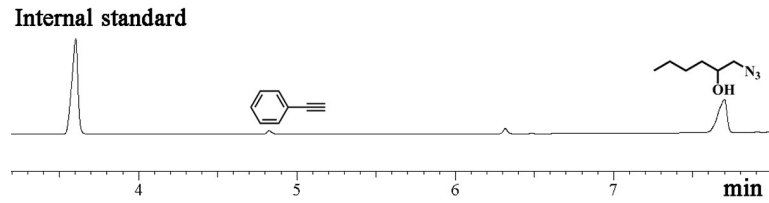

(e)

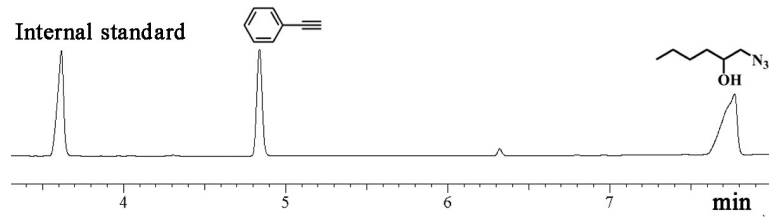

(f)

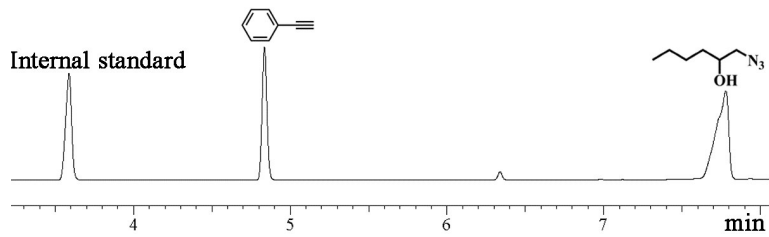

(g)

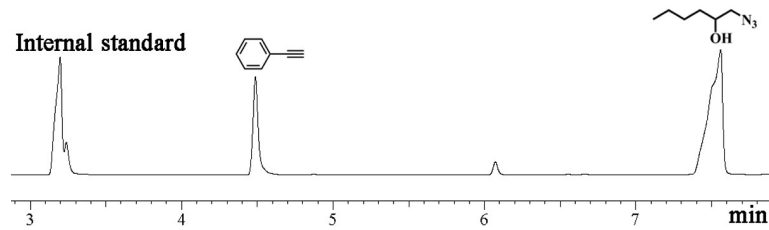

(h)

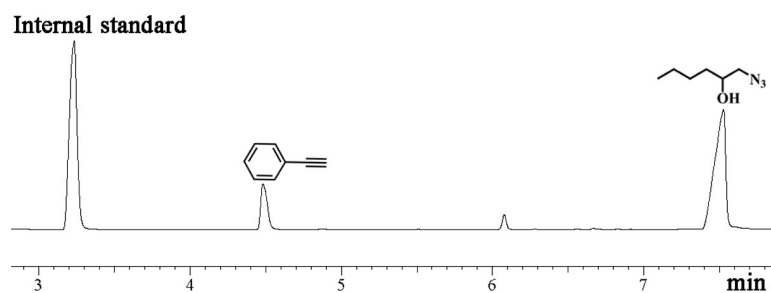

(i)

**Fig. S19** GC of reactions of 1-azido-2-hexanol and phenylacetylene under different conditions: (a) **1** (0 mg), MeOH, 8 h, 80°C. (b) **1** (5 mg), MeOH, 8 h, 80 °C. (c) **1** (10 mg), MeOH, 8 h, 80 °C. (d) **1** (10 mg), EtOH, 8 h, 80°C. (e) **1** (15 mg), MeOH, 8 h, 80°C. (f) **1** (10 mg), MeCN, 8 h, 80°C. (g) **1** (10 mg), MeOH, 8 h, 25°C. (h) **1** (10 mg), MeOH, 8 h, 40°C. (i) **1** (10 mg), MeOH, 8 h, 60 °C.

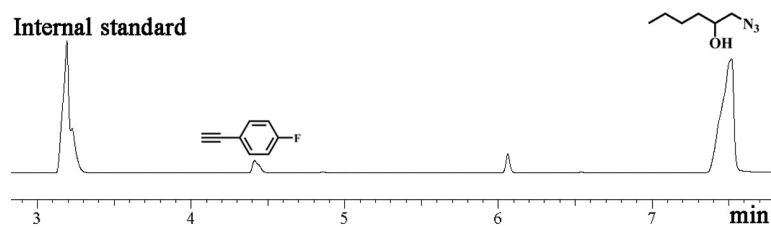

(a)

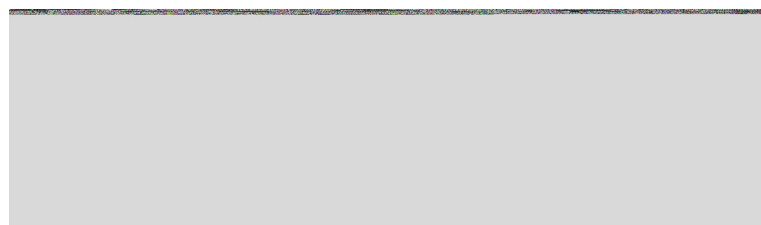

(b)

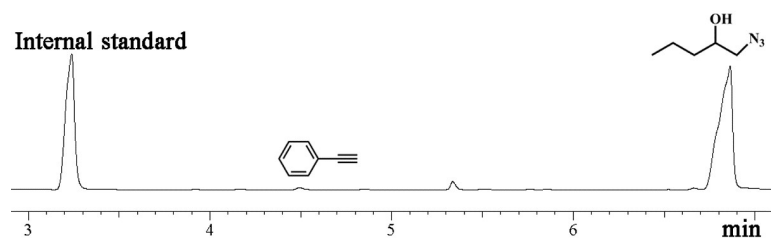

(c)

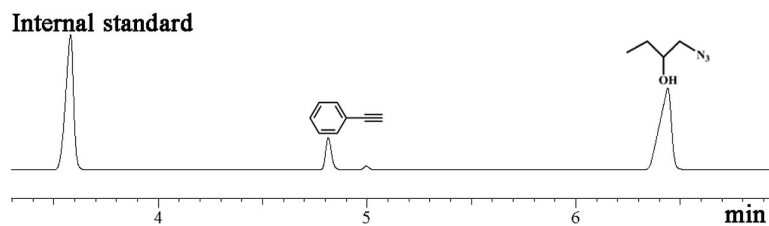

(d)

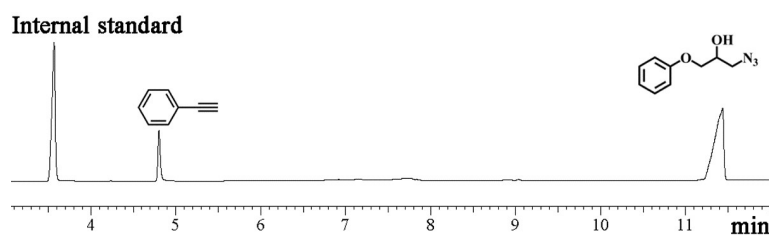

(e)

**Fig. S20** GC of reactions of substituted  $\beta$ -OH azides and phenylacetylenes with different groups under the same condition (**1** (10 mg), MeOH, 8 h, 80 °C):

- (a) 1-azido-2-hexanol and phenylacetylene as substrates.
- (b) 1-azido-2-hexanol and 1-ethynyl-4-fluorobenzene as substrates.
- (c) 1-azido-2-pentanol and phenylacetylene as substrates.
- (d) 1-azido-2-butanol and phenylacetylene as substrates.
- (e) 1-azido-3-phenoxy-2-propanol and phenylacetylene as substrates.

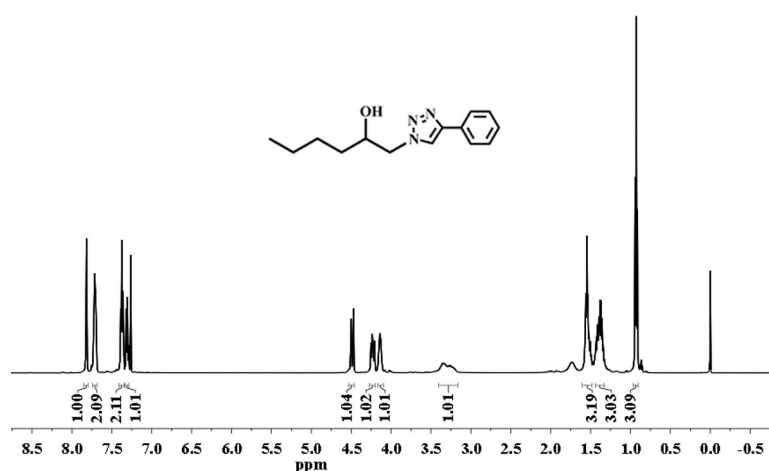

**Fig. S21**  $^1\text{H}$  NMR (500 MHz,  $\text{CDCl}_3$ ) for 1-(4-phenyl-1H-1,2,3-triazol-1-yl)hexan-2-ol.

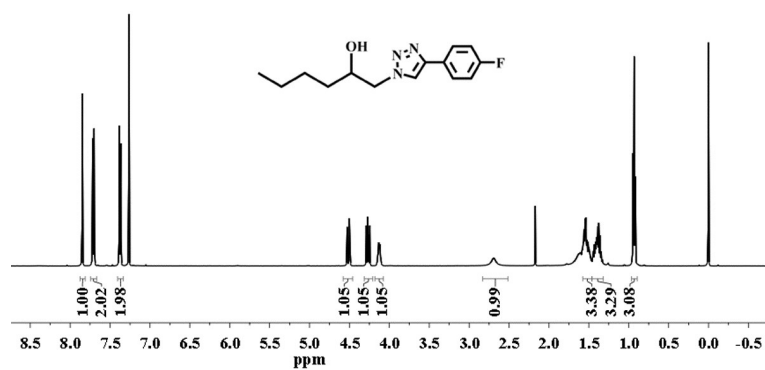

**Fig. S22**  $^1\text{H}$  NMR (500 MHz,  $\text{CDCl}_3$ ) for 1-(4-(4-fluorophenyl)-1H-1,2,3-triazol-1-yl)hexan-2-ol.

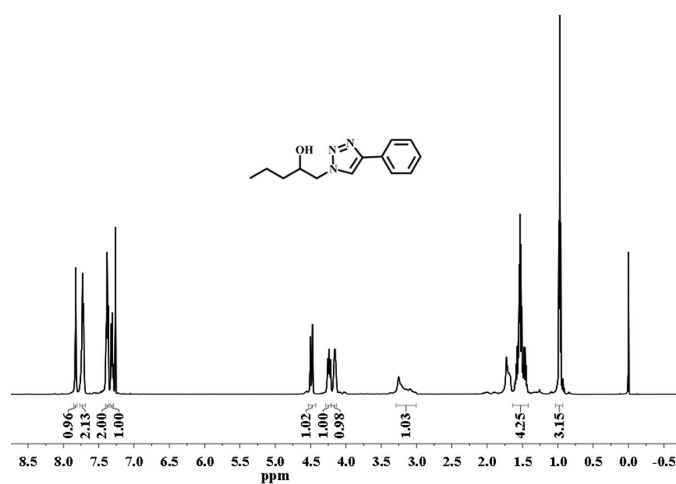

**Fig. S23**  $^1\text{H}$  NMR (500 MHz,  $\text{CDCl}_3$ ) for 1-(4-phenyl-1H-1,2,3-triazol-1-yl)pentan-2-ol.

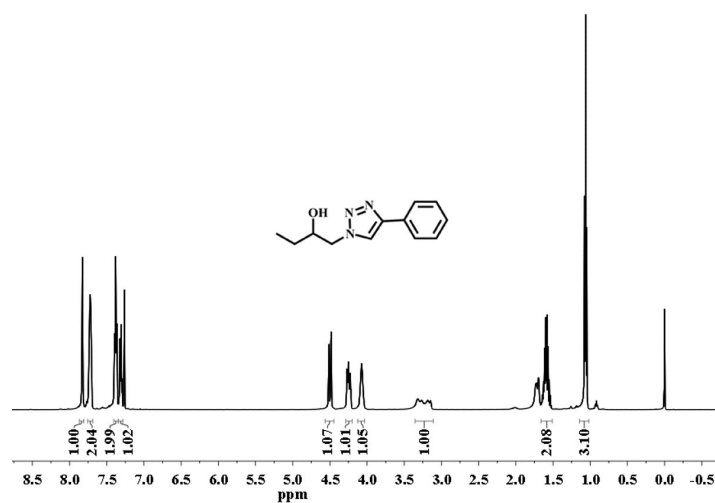

**Fig. S24**  $^1\text{H}$  NMR (500 MHz,  $\text{CDCl}_3$ ) for 1-(4-phenyl-1H-1,2,3-triazol-1-yl)butan-2-ol.

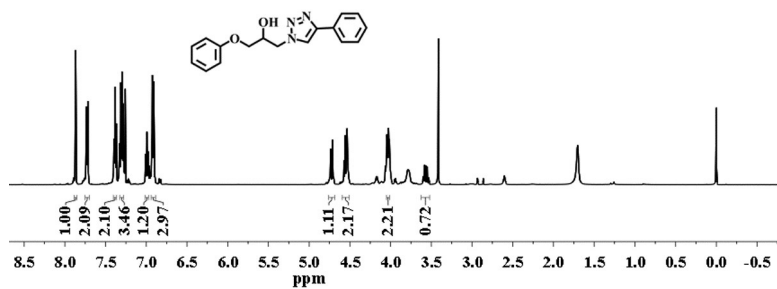

**Fig. S25**  $^1\text{H}$  NMR (500 MHz,  $\text{CDCl}_3$ ) for 1-phenoxy-3-(4-phenyl-1H-1,2,3-triazol-1-yl)propan-2-ol.

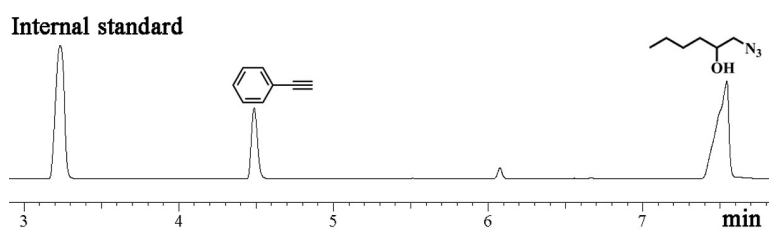

(a)

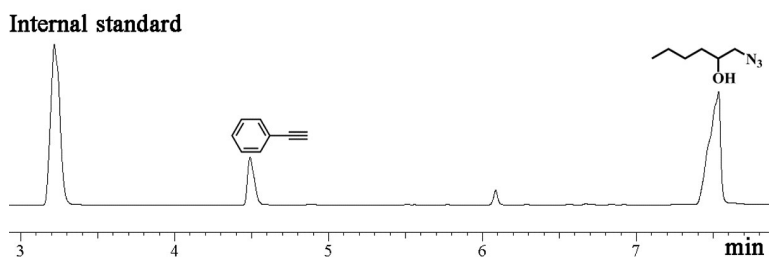

(b)

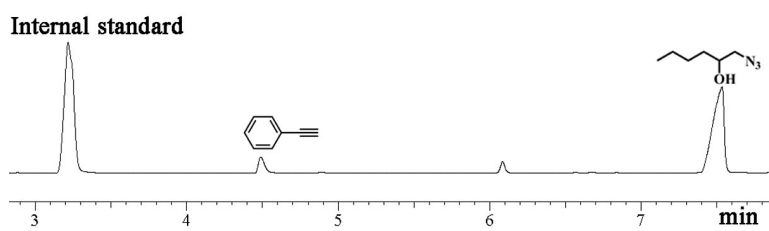

(c)

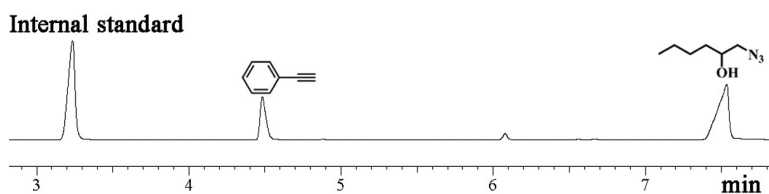

(d)



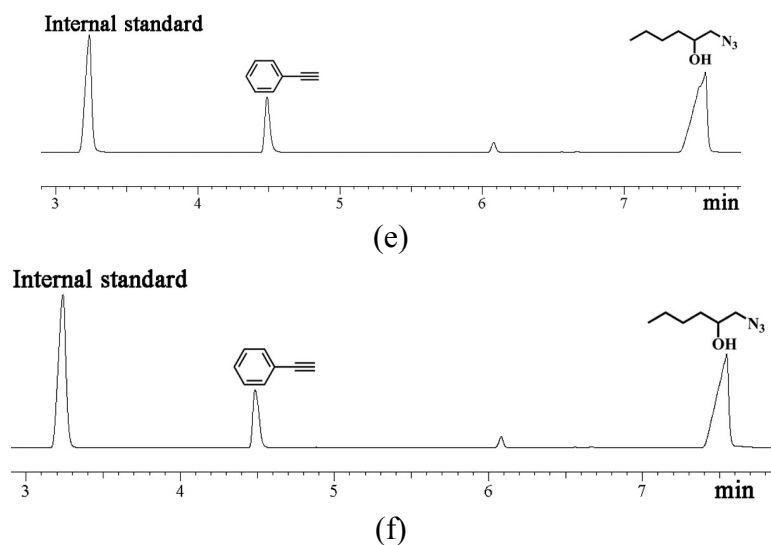

**Fig. S26** GC of reactions of 1-azido-2-hexanol and phenylacetylene with kinetic and hot filtration experiments: (a) **1** (10 mg), MeOH, 2h, 80°C; (b) **1** (10 mg), MeOH, 4h, 80°C. (c) **1** (10 mg), MeOH, 6h, 80 °C. (d) MeOH, 4 h, the filtrate after removing **1** after 2 h of the reaction. (e) MeOH, 6 h, the filtrate after removing **1** after 2 h of the reaction. (f) MeOH, 8 h, the filtrate after removing **1** after 2 h of the reaction.

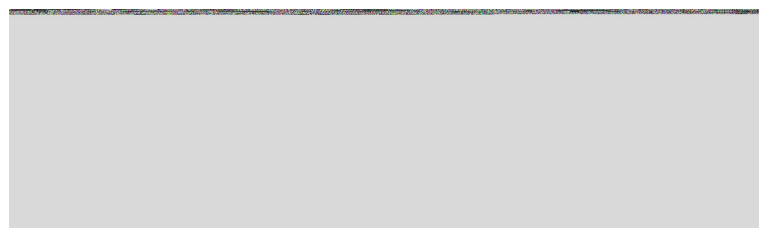

(a)

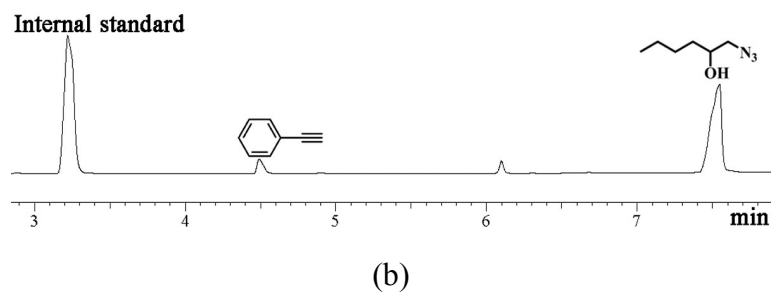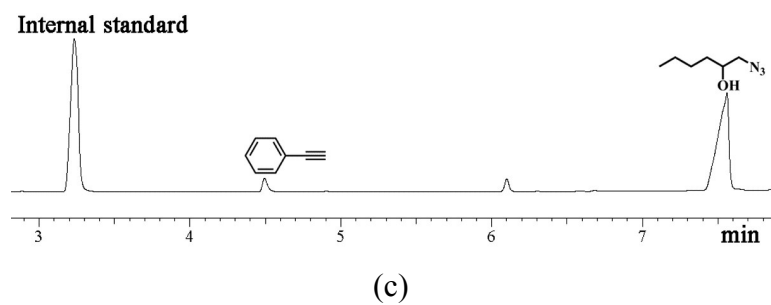

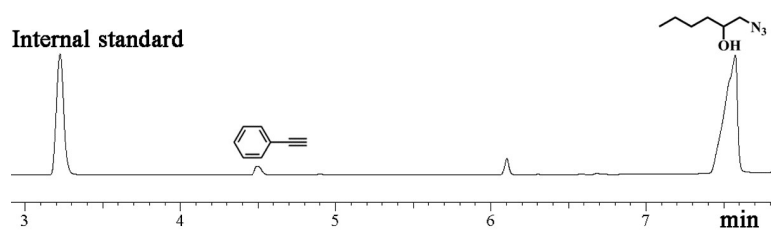

(d)

**Fig. S27** GC of reactions of 1-azido-2-hexanol and phenylacetylene in different circles: (a) the first circle. (b) the second circle. (c) the third circle. (d) the fourth circle.
